# Supplementary material for: Limobrevibacterium gyesilva gen. nov., sp. nov., Isolated from Forest Soil
Source: MDPI journal article supplement (doi:10.3390/d15050684), 2023-05-19
Supplement: s1 [file s1]

## Supplementary Materials

International Journal of Systematic and Evolutionary Microbiology

### *Limobrevibacterium gyesilva* gen. nov., sp. nov., Isolated from Forest Soil

<sup>1</sup>Nhan Le Thi Tuyet, <sup>1</sup>Jaisoo Kim\*

<sup>1</sup>Department of Life Science, College of Natural Sciences, Kyonggi University, Suwon, Kyonggi-Do 16227, Republic of Korea

\*Corresponding author: Jaisoo Kim.

Tel: +82-31-249-9648; Fax: +82-31-249-9604

Email: [jkintamu@kgu.ac.kr](mailto:jkintamu@kgu.ac.kr)

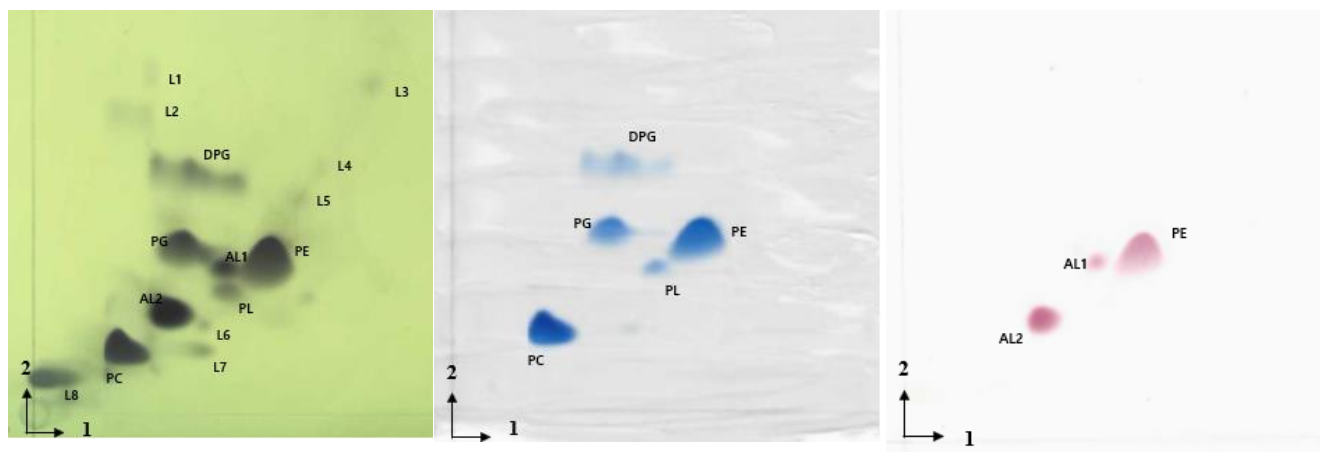

**Supplementary Figure S1.** Polar lipid profile of strain RN2-1<sup>T</sup>

PG - phosphatidylglycerol; DPG - diphosphatidylglycerol; PE - phosphatidylethanolamine; PC - phosphatidylcholine, PL - unidentified phospholipid, AL1-2 – unidentified aminolipid, L1-8 – unidentified polar lipids.

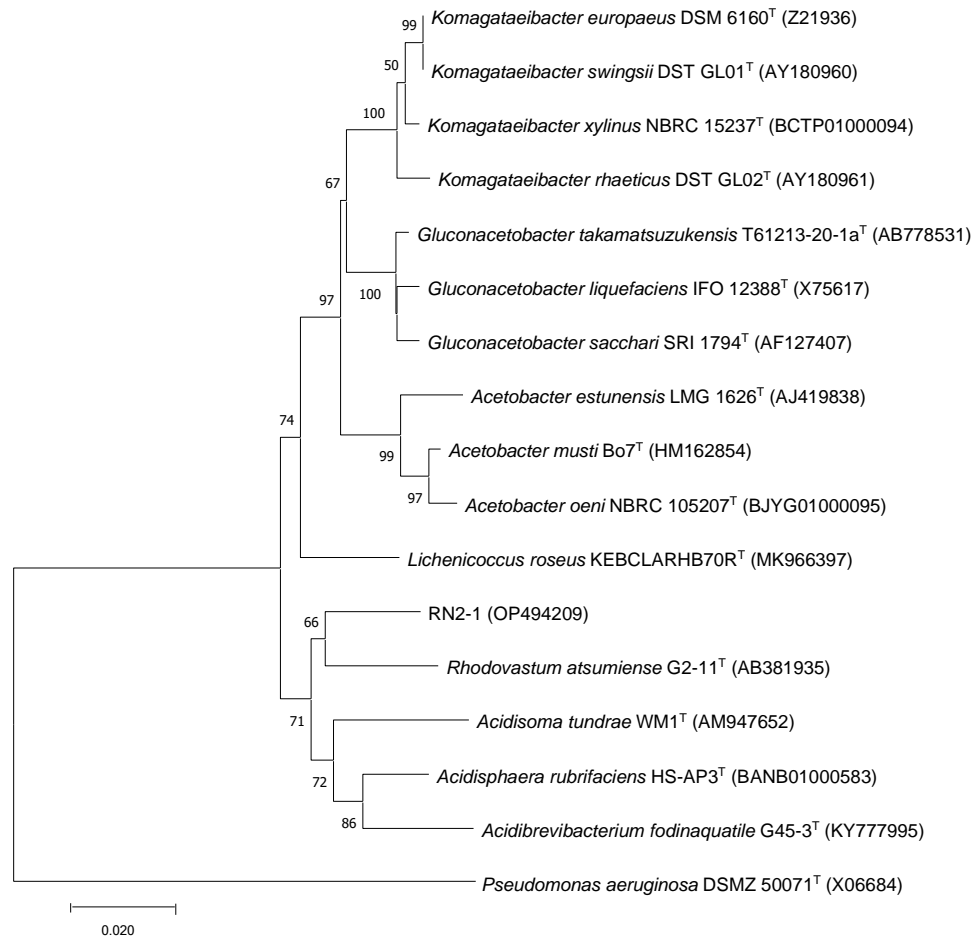

**Supplementary Figure S2.** Phylogenetic tree reconstructed with the Minimum Evolution method based on 16S rRNA gene sequences of strain RN2-1<sup>T</sup> and type species of the family *Acetobacteraceae*. *Pseudomonas aeruginosa* DSMZ 5071<sup>T</sup> was used as an outgroup. Numbers at branch nodes represent confidence levels (values>50% are shown) from 1000 replicate bootstrap samplings. GenBank accession numbers are given in parentheses. Bar, 0.02 substitutions per nucleotide position. Evolutionary analyses were conducted in MEGA X.

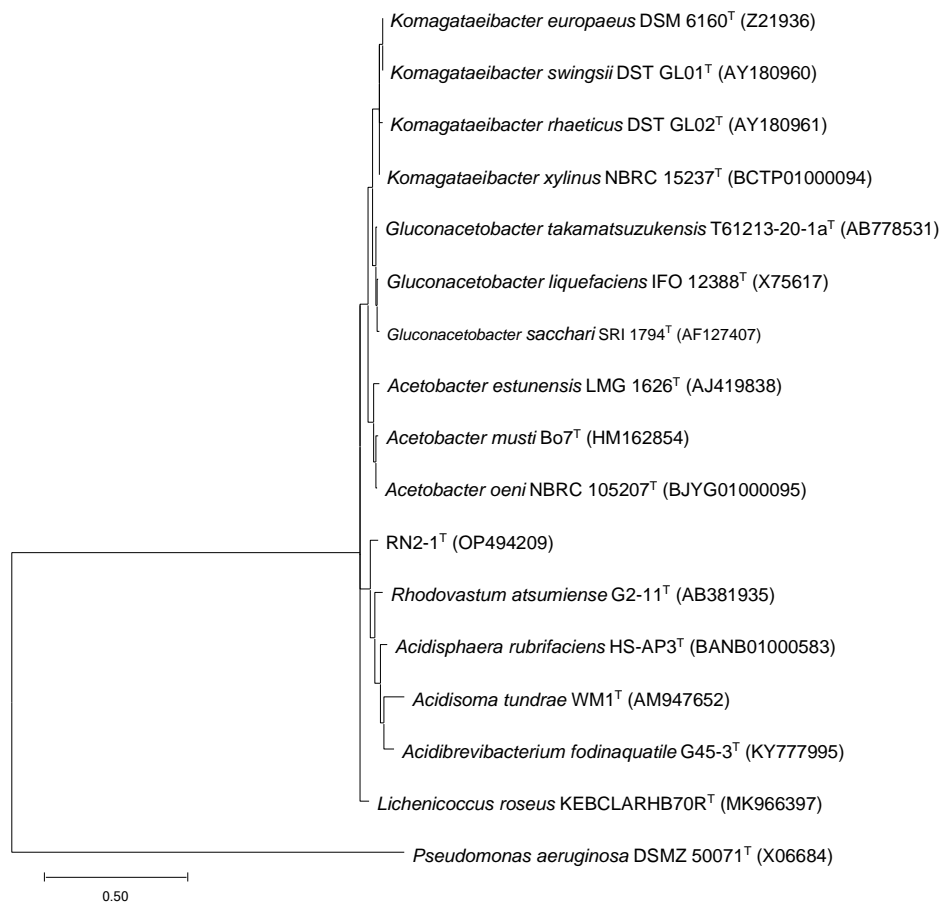

**Supplementary Figure S3.** Phylogenetic tree reconstructed with the Maximum Likelihood method based on 16S rRNA gene sequences of strain RN2-1<sup>T</sup> and type species of the family *Acetobacteraceae*. *Pseudomonas aeruginosa* DSMZ 5071<sup>T</sup> was used as an outgroup. Numbers at branch nodes represent confidence levels (values >50% are shown) from 1000 replicate bootstrap samplings. GenBank accession numbers are given in parentheses. Bar, 0.50 substitutions per nucleotide position. Evolutionary analyses were conducted in MEGA X.

**Supplemental Table S1.** Modified of MM2V medium.

|   | Composition       | Capacity | Unit |
|---|-------------------|----------|------|
| 1 | Peptone           | 1.0      | g/L  |
| 2 | KH2PO4            | 0.2      | g/L  |
| 3 | NaCl              | 0.2      | g/L  |
| 4 | NH4NO3            | 0.2      | g/L  |
| 5 | MgSO4. 5H2O       | 0.04     | g/L  |
| 6 | CaCl2. 5H2O       | 0.04     | g/L  |
| 7 | Yeast extract     | 0.1      | g/L  |
| 8 | Vitamin solution* | 1        | ml/L |
|   | pH                | 7.0-7.5  |      |
|   | *Vitamin solution |          |      |
| 1 | p-aminobenzoate   | 1.0      | mg   |
| 2 | Biotin            | 0.2      | mg   |
| 3 | Nicotinic acid    | 2.0      | mg   |
| 4 | Thiamin HCl       | 1.0      | mg   |
| 5 | Ca-pantothenate   | 0.5      | mg   |
| 6 | Pyridoxamine      | 5        | mg   |
| 7 | Vitamin B12       | 2        | mg   |
| 8 | Distilled water   | 100      | mL   |

**Supplemental Table S2.** Results from API ZYM, API 20NE test. 1, RN2-1; 2, *Rhodovastum atsumiense*. All data are from the present study. +, positive; -, negative.

| Characteristics                     | 1 | 2 |
|-------------------------------------|---|---|
| <b>Enzymatic reaction (API ZYM)</b> |   |   |
| Alkaline phosphate                  | + | + |
| Esterase                            | + | + |
| Esterase lipase (C8)                | - | - |
| Lipase (C14)                        | - | - |
| Leucine arylamidase                 | + | + |
| Valine arylamidase                  | - | - |
| Crystine arylamidase                | - | - |
| Trypsin                             | - | - |
| Alpha chymotrypsin                  | - | + |
| Acid phosphatase                    | + | + |
| Naphthol-AS-BI- phosphate           | + | + |
| Alpha galactosidase                 | - | - |
| Beta galactosidase                  | - | - |
| Beta glucuronidase                  | - | - |
| Alpha glucosidase                   | - | - |
| Beta glucosidase                    | - | - |
| N-acetyl beta glucosaminidase       | - | - |
| Alpha monosidase                    | - | - |
| Alpha fucosidase                    | - | - |
| <b>API 20NE</b>                     |   |   |
| Nitrate reduction                   | + | - |
| Indole production                   | - | - |
| Glucose fermentation                | - | + |
| Arginine dihydrolase                | - | + |
| Urease                              | - | + |
| Aesculin hydrolysis                 | - | - |
| Gelatin hydrolysis                  | - | + |
| β - Galactosidase                   | - | - |

**Supplemental Table S3.** Results from carbon source utilization 1, RN2-1 (data from this study); 2, *Rhodovastum atsumiense* [5]; 3, *Acidisphaera rubrifaciens* [6]; 4, *Lichennicoccus roseus* [4]; 5, *Acidibrevibacterium fodinaquatile* [7]; 6, *Acidisoma tundrae* [8]. ++, good growth; +, moderate growth; +/-, little or ambiguous growth; -, no growth.

| <b>Carbon-source utilization</b> | <b>1</b> | <b>2</b> | <b>3</b> | <b>4</b> | <b>5</b> | <b>6</b> |
|----------------------------------|----------|----------|----------|----------|----------|----------|
| Acetate                          | -        | ++       | -        | -        | nd       | -        |
| Lactate                          | -        | +        | +        | -        | nd       | +        |
| Mannose                          | +/-      | +        | -        | +        | -        | +        |
| Sorbitol                         | +/-      | +        | +        | +        | +        | +        |
| Glycerol                         | +/-      | -        | +        | -        | -        | +        |
| Asparagine                       | +        | +        | -        | -        | +        | +        |
| Aspartate                        | -        | +        | -        | nd       | +        | -        |
| Glutamate                        | -        | ++       | -        | -        | nd       | nd       |
| Peptone                          | +        | +        | +/-      | +        | nd       | +        |
| Casamino acid                    | ++       | +        | +/-      | +        | -        | +        |
| Methanol                         | +/-      | -        | -        | -        | +        | -        |
| Ethanol                          | +        | +        | +        | +        | +        | +        |
| Glutamine                        | ++       | ++       | -        | -        | nd       | nd       |
| Propanol                         | +        | +        | -        | -        | +        | -        |
| Alanine                          | +        | nd       | -        | nd       | +        | -        |
| Butanol                          | +/-      | +        | -        | nd       | -        | -        |
| Pyruvate                         | ++       | ++       | ++       | +        | -        | +        |
| Fumarate                         | +        | ++       | +        | nd       | -        | -        |
| Succinate                        | +        | ++       | +        | -        | -        | -        |
| Formate                          | -        | -        | nd       | nd       | nd       | -        |
| Gluconate                        | +        | ++       | ++       | -        | nd       | +        |
| Propionate                       | -        | -        | +/-      | -        | nd       | -        |
| Butyrate                         | -        | -        | +/-      | -        | nd       | +        |
| Citrate                          | ++       | -        | +/-      | -        | nd       | -        |
| Benzoate                         | -        | -        | +/-      | nd       | nd       | -        |
| Sucrose                          | +/-      | -        | +/-      | +        | nd       | -        |
| Malate                           | +        | ++       | ++       | +        | -        | +        |
| D-glucose                        | +/-      | +        | +        | +        | +        | +        |
| L-arabinose                      | +/-      | +        | +/-      | +        | +        | nd       |
| D-mannitol                       | +/-      | +        | nd       | +        | -        | +        |

**Supplementary Table S4.** Detailed cellular fatty acid profiles (% of totals) of strain RN2-1<sup>T</sup> and closely related reference strains. Strains; 1, RN2-1; 2, *Rhodovastum atsumiense* KCTC5708; 3, *Acidisphaera rubrifaciens* JCM10600; 4, *Lichennicoccus roseus* KCTC72321; 5, *Acidibrevibacterium fodinaquatile* KCTC62275; 6, *Acidisoma tundrae* DSM19999. All data are from present study. Fatty acids that represent <0.1% of total in all strains are not shown; -, not detected.

| Fatty acid                    | 1     | 2     | 3     | 4     | 5     | 6     |
|-------------------------------|-------|-------|-------|-------|-------|-------|
| <b>Saturated</b>              |       |       |       |       |       |       |
| C <sub>12:0</sub>             | -     | -     | -     | 0.21  | -     | -     |
| C <sub>14:0</sub>             | 1.26  | 2.30  | 1.14  | 0.15  | 0.16  | -     |
| C <sub>16:0</sub>             | 6.54  | 20.47 | 20.07 | 7.82  | 22.22 | 10.33 |
| C <sub>18:0</sub>             | 1.02  | 2.17  | 1.31  | 2.71  | -     | 4.73  |
| C <sub>20:0</sub>             | -     | 0.13  | -     | -     | -     | -     |
| 10-methyl C <sub>17:0</sub>   | -     | 0.68  | -     | -     | -     | -     |
| 10-methyl C <sub>19:0</sub>   | -     | 0.22  | -     | -     | -     | -     |
| anteiso -C <sub>11:0</sub>    | -     | 0.14  | -     | -     | 0.14  | -     |
| anteiso C <sub>13:0</sub>     | -     | 0.17  | -     | -     | 0.16  | -     |
| Cyclo-C <sub>17:0</sub>       | 5.62  | -     | -     | -     | 1.06  | -     |
| <b>Unsaturated</b>            |       |       |       |       |       |       |
| C <sub>16:1</sub> ω5c         | 1.25  | 2.43  | -     | 0.16  | 0.19  | -     |
| C <sub>16:1</sub> ω7c alcohol | -     | 0.19  | -     | -     | -     | -     |
| C <sub>16:1</sub> ω9c         | -     | -     | -     | -     | 0.19  | -     |
| C <sub>17:1</sub> ω6c         | -     | 0.31  | -     | -     | -     | -     |
| C <sub>17:1</sub> ω7c         | -     | 0.21  | -     | -     | -     | -     |
| C <sub>18:1</sub> ω5c         | -     | 0.74  | -     | 0.62  | -     | -     |
| C <sub>18:1</sub> ω9c         | -     | 0.40  | -     | -     | 0.10  | 3.33  |
| C <sub>20:1</sub> ω7c         | -     | 0.58  | -     | -     | -     | -     |
| cyclo C <sub>19:0</sub> ω8c   | 7.85  | 0.57  | 20.80 | 1.25  | -     | 38.51 |
| <b>Hydroxy</b>                |       |       |       |       |       |       |
| C <sub>16:0</sub> 2OH         | -     | 0.37  | -     | -     | 0.14  | -     |
| C <sub>16:0</sub> 3OH         | -     | -     | 0.68  | 1.27  | -     | -     |
| C <sub>18:0</sub> 3OH         | 0.68  | 1.56  | 0.81  | 1.64  | -     | 9.72  |
| C <sub>18:1</sub> 2OH         | 6.98  | 0.81  | 10.98 | 16.60 | -     | 3.62  |
| iso -C <sub>16:0</sub> 3OH    | -     | 0.13  | -     | -     | -     | -     |
| iso C <sub>18:1</sub> H       | -     | 0.20  | -     | -     | 0.17  | -     |
| <b>Summed features*</b>       |       |       |       |       |       |       |
| Summed Feature 2              | -     | 3.51  | -     | 2.33  | 2.00  | 1.26  |
| Summed Feature 3              | 7.65  | 9.69  | 0.58  | 0.51  | 0.72  | -     |
| Summed Feature 8              | 61.14 | 51.84 | 43.64 | 62.50 | 2.97  | 28.50 |

\*Summed features represent two or three fatty acids that can not be separated by the Microbial Identification System. Summed feature 2 consisted of C<sub>16:1</sub> iso I/C<sub>14:0</sub> 3OH; summed feature 3 consist of C<sub>16:1</sub> ω7c/C<sub>16:1</sub> ω6c summed feature 8 consist of C<sub>18:1</sub> ω7c/ C<sub>18:1</sub> ω6c.

**Supplementary Table S5.** Alcohol dehydrogenase proteins in RN2-1<sup>T</sup> genome.

| Accession         | Locus tag    | Protein product | Length | Protein name                                        |
|-------------------|--------------|-----------------|--------|-----------------------------------------------------|
| JAPDNT000000000.1 | WP_264711838 | WP_264711838.1  | 6.0    | Methanol/ethanol family PQQ-dependent dehydrogenase |
| JAPDNT000000000.1 | WP_264712314 | WP_264712314.1  | 170    | c-type cytochrome, methanol metabolism-related      |
